# Supplementary material
Source: Springer Nature journal article supplement (https://www.springermedizin.de/resource/supplementary/13049_2014_748_MOESM2_ESM.pdf/9667208)
Supplement: MOESM2 [file 9667208]

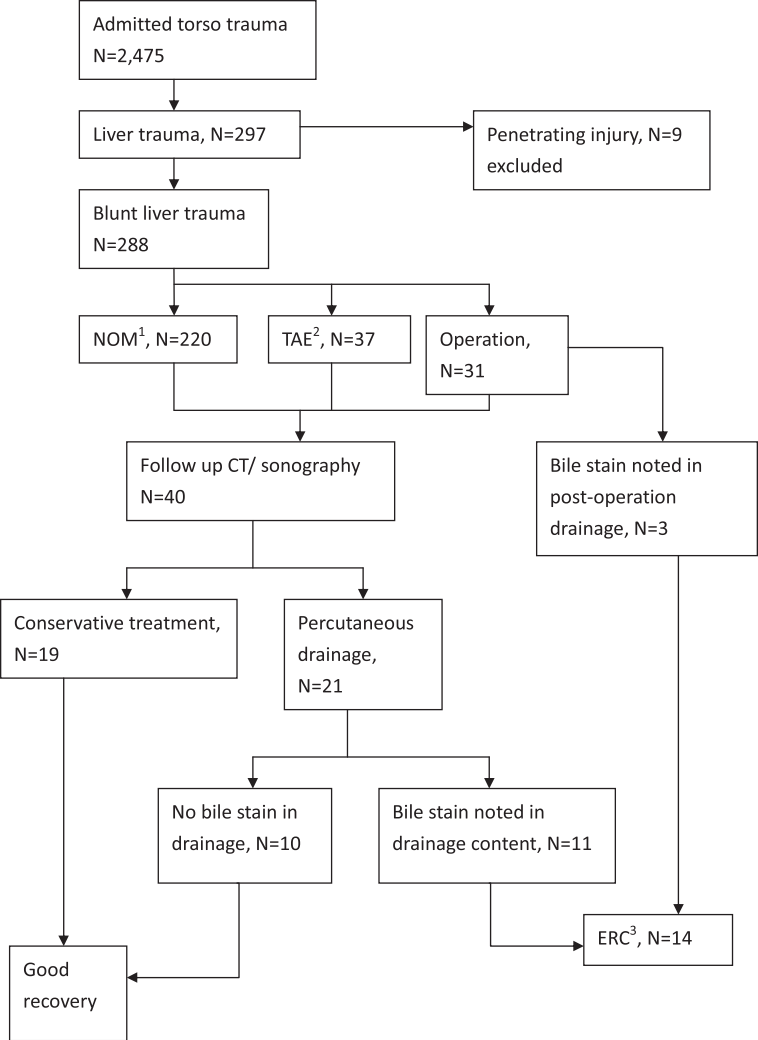

1. Non-Operative Management: no operation, no embolization

2. Transcatheter Artery Embolization

3. Endoscopic Retrograde Cholangiography
